# Supplementary material
Source: publisher site journal article supplement (https://www.dovepress.com/article/212117)
Supplement: Supplementary file 1 [file get_supplementary_file.php]

**Supplementary materials**

**Supplementary Table 1. The overlapping of pain symptoms**

| Number of patients | Pain symptoms | | | |
| --- | --- | --- | --- | --- |
| Dysmenorrhea | CPP | Dyspareunia | Anorectal pain |
| 131 | √ |  |  |  |
| 10 |  | √ |  |  |
| 2 |  |  | √ |  |
| 42 | √ | √ |  |  |
| 8 | √ |  | √ |  |
| 11 | √ | √ | √ |  |
| 4 | √ | √ |  | √ |
| 1 |  | √ | √ | √ |
| 2 | √ | √ | √ | √ |

Abbreviation: CPP, chronic pelvic pain

**Supplementary Table 2. The comparison between adenomyosis patients with or without dysmenorrhea.**

| **Variables** | **Dysmenorrhea group**  **%(No.)** | **None**- **dysmenorrhea group**  **%(No.)** | **P** |
| --- | --- | --- | --- |
| Number of patients | 131 | 93 |  |
| **Age at diagnose**  (Median [IQR], y) | 40.0（34.0-44.0） | 42.0（36.0-46.0） | P=0.012* |
| **Age at onset of disease**  (Median [IQR], y) | 33.0（29.0-39.0） | 36.0（30.0-42.0） | P=0.012* |
| **Interval between onset and diagnose**  (Median [IQR], d) | 4.0（2.0-7.0） | 4.0（2.0-7.0） | P=0.375 |
| **Age of menarche**  (Median [IQR], y) | 14.0（13.0-15.0） | 14.0（13.0-15.0） | P=0.765 |
| **Duration of mense**  (Median [IQR], d) | 5.5（4.5-6.5） | 5.5（4.5-6.5） | P=0.078 |
| **Interval of mense**  (Median [IQR], y) | 28.5（26.5-29.0） | 29.0（27.0-29.0） | P=0.397 |
| **Gravidity (n)** |  |  |  |
| n=0 | 21.8%（26） | 26.8%（22） | P=0.416 |
| n>=1 | 78.2% (93) | 73.2% (60) |  |
| **Parity (n)** |  |  |  |
| n=0 | 43.8%（57） | 40.0%（36） | P=0.570 |
| n>=1 | 56.2% (73) | 60.0% (54) |  |
| **Menorrhagia** |  |  |  |
| Yes | 22.1%（29） | 28.0%（26） | P=0.319 |
| No | 77.9% (102) | 72.0% (67) |  |
| **Rectal irritation** |  |  |  |
| Yes | 11.5%（15） | 7.5%（7） | P=0.331 |
| No | 88.5% (116) | 92.5% (86) |  |
| **Bladder irritation** |  |  |  |
| Yes | 10.7%（14） | 7.5%（7） | P=0.424 |
| No | 89.3% (117) | 92.5% (86) |  |
| **Pre-surgical HGB**  [Median (IQR), g/L] | 127（116-135.8） | 127（109.0-135.0） | P=0.444 |
| **Pre-surgical GnRHa** |  |  |  |
| Yes | 20.6%（27） | 15.1%（14） | P=0.289 |
| No | 79.4% (104) | 84.9% (79) |  |
| **Pre-surgical Ca125 level** [Median (IQR), U/mL] | 92.3（45.3-174.1） | 40.5（17.8-76.3） | P＜0.001* |
| **Pre-surgical Ca125 elevated** |  |  |  |
| Yes | 85.0%（85） | 46.7%（28） | P＜0.001* |
| No | 15.0% (15) | 53.3% (32) |  |
| **Pre-surgical Ca199 level** [Median (IQR), U/mL] | 17.7（10.8-30.2） | 14.5（7.0-28.3） | P=0.579 |
| Parameter of ultrasound |  |  |  |
| **Volume of uterus**  [Median (IQR), cm3] | 133.4（82.2-232.9） | 127.6（70.4-230.1） | P=0.762 |
| **Thicken myometrial layer** |  |  |  |
| Yes | 25.2%（33） | 5.4%（5） | P＜0.001* |
| No | 74.8% (98) | 94.6% (88) |  |
| **Coexisting EM** |  |  |  |
| Yes | 40.5%（53） | 25.8%（24） | P=0.023* |
| No | 59.5%（78） | 74.2%（69） |  |
| **Degree of coexisting EM** (rAFS) |  |  |  |
| None or Mild (Stage I+II) | 24.5%（13） | 41.7%（10） | P=0.128 |
| Moderate and severe (Stage III+IV) | 75.3% (40) | 58.3%（14） |  |
| **Coexisting uterine fibroids** |  |  |  |
| Yes | 57.3%（75） | 65.6%（61） | P=0.208 |
| No | 42.7%（56） | 34.4%（32） |  |
| **Coexisting endometrial lesions** |  |  |  |
| Yes | 11.5%（15） | 8.6%（8） | P=0.489 |
| No | 88.5%（116） | 91.4%（85） |  |

Abbreviation: EM, endometriosis; CPP, chronic pelvic pain; GnRHa, gonadotropin releasing hormone agonist; HBG, hemoglobin; rAFS, staging system revised by American Fertility Society.

Note:* the difference reached statistical significance

**Supplementary Table 3. The multivariate analysis for adenomyosis patients with dysmenorrhea by Logistic regression**

| **Variables** | **P value** | **OR (95% CI)** |
| --- | --- | --- |
| Age at diagnose | 0.576 | 0.971(0.874~1.077) |
| Age of onset of disease | 0.685 | 0.980(0.887~1.082) |
| Pre-surgical CA125 elevated | <0.001* | 5.140(2.254~11.719) |
| Anterior myometrial layer thicken | 0.569 | 2.147(0.155~29.785) |
| Posterior myometrial layer thicken | 0.008* | 5.821(1.588~21.337) |
| Diffused myometrial layer thicken | 1.000 | / |
| Coexisting endometriosis | 0.672 | 0.845(0.388~1.841) |

Note:* the difference reached statistical significance.
